# Supplementary material for: Models of Breast Morphogenesis Based on Localization of Stem Cells in the Developing Mammary Lobule
Source: PubMed Central journal article supplement — Stem Cell Reports. 2015 Mar 26;4(4):699–711. doi: 10.1016/j.stemcr.2015.02.013 (PMC4400614; doi:10.1016/j.stemcr.2015.02.013), 2015-03-26
Supplement: mmc1.pdf [file mmc1.pdf]

**Stem Cell Reports, Volume 4**

**Supplemental Information**

**Models of Breast Morphogenesis Based  
on Localization of Stem Cells  
in the Developing Mammary Lobule**

**Gabriella Honeth, Tommaso Schiavinotto, Federico Vaggi, Rebecca Marlow, Tokuwa Kanno, Ireneusz Shinomiya, Sara Lombardi, Bharath Buchupalli, Rosalind Graham, Patrycja Gazinska, Vernie Ramalingam, Joy Burchell, Anand D. Purushotham, Sarah E. Pinder, Attila Csikasz-Nagy, and Gabriela Dontu**

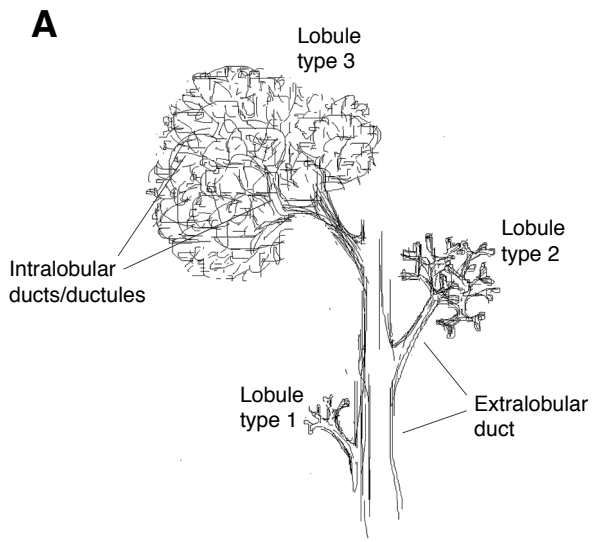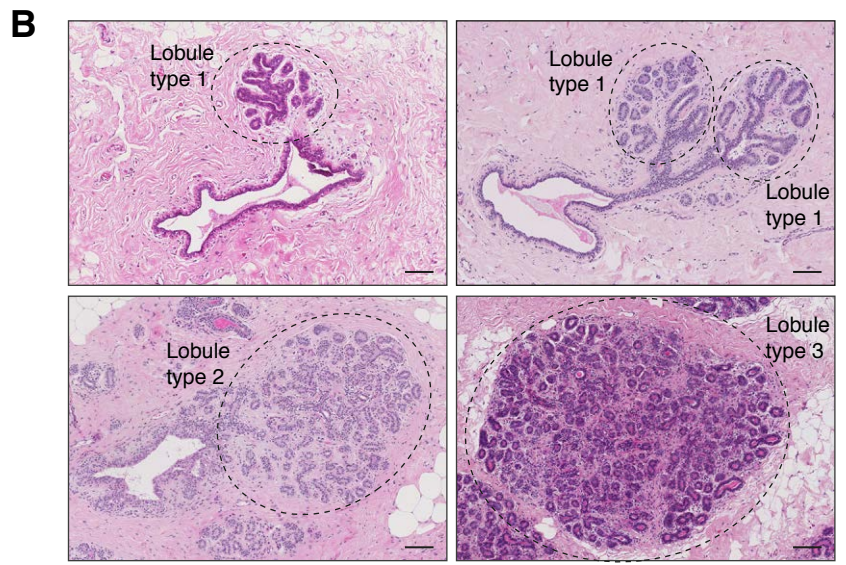

**C**

|                               | Fate 1                       | Fate 2               |
|-------------------------------|------------------------------|----------------------|
| <b>A. Type of SC division</b> | Asymmetric self-renewal (A1) | Differentiation (A2) |
| <b>B. Rate of SC division</b> | Low (B1)                     | High (B2)            |
| <b>C. Orientation of SC</b>   | Distal (C1)                  | Proximal (C2)        |

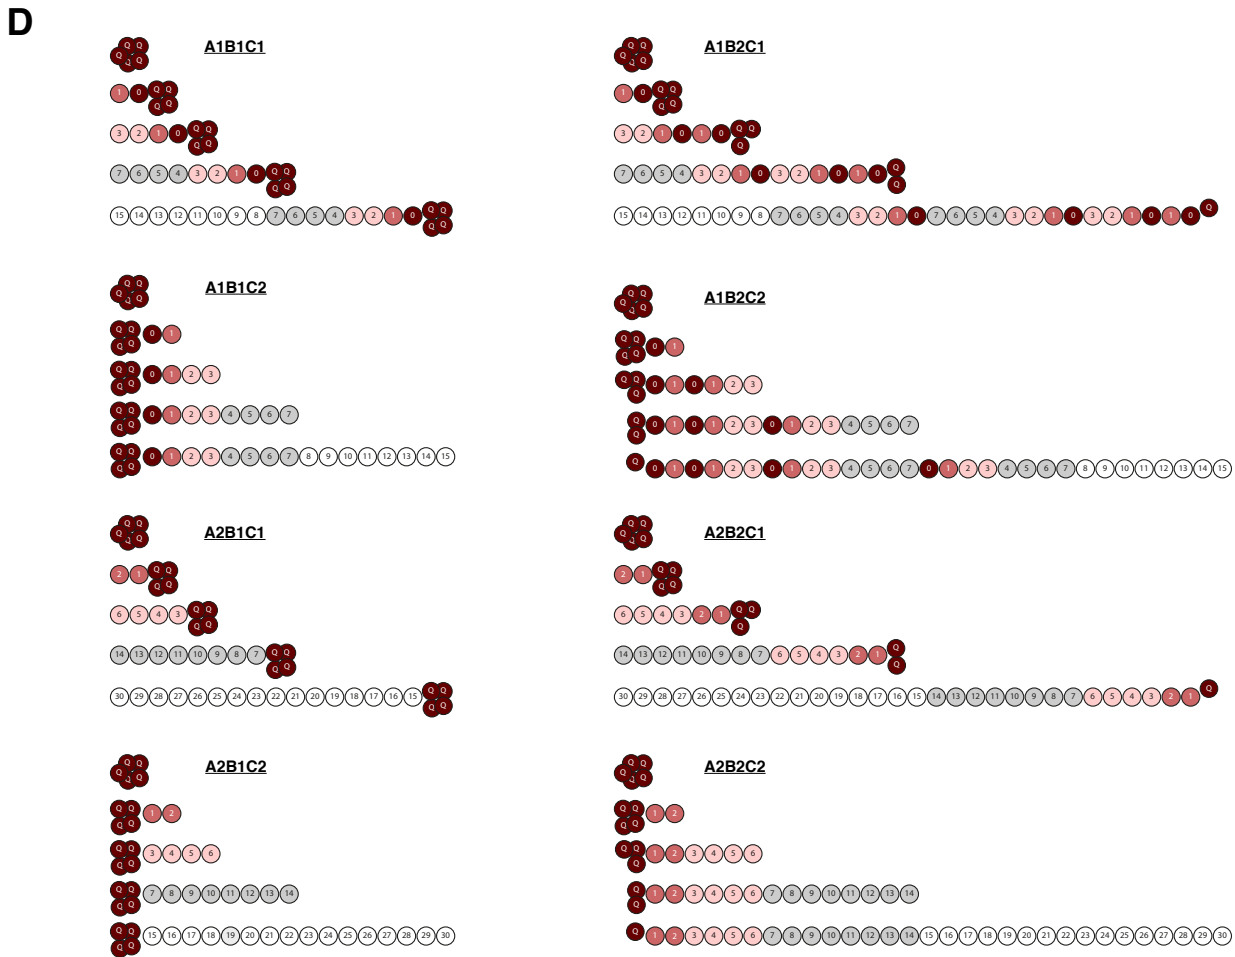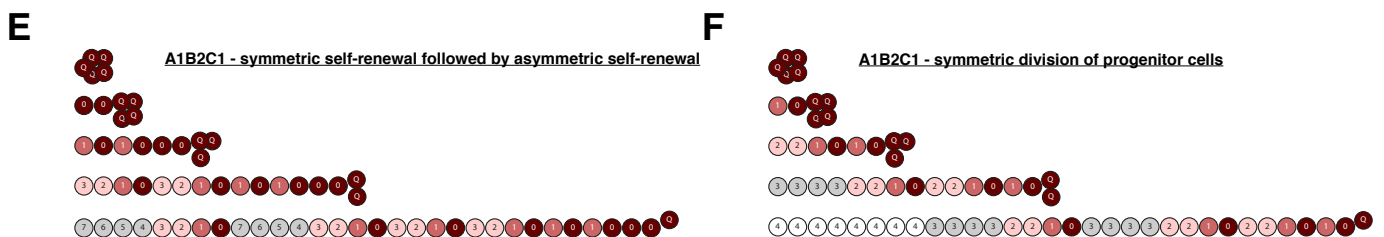

**FIGURE S1**

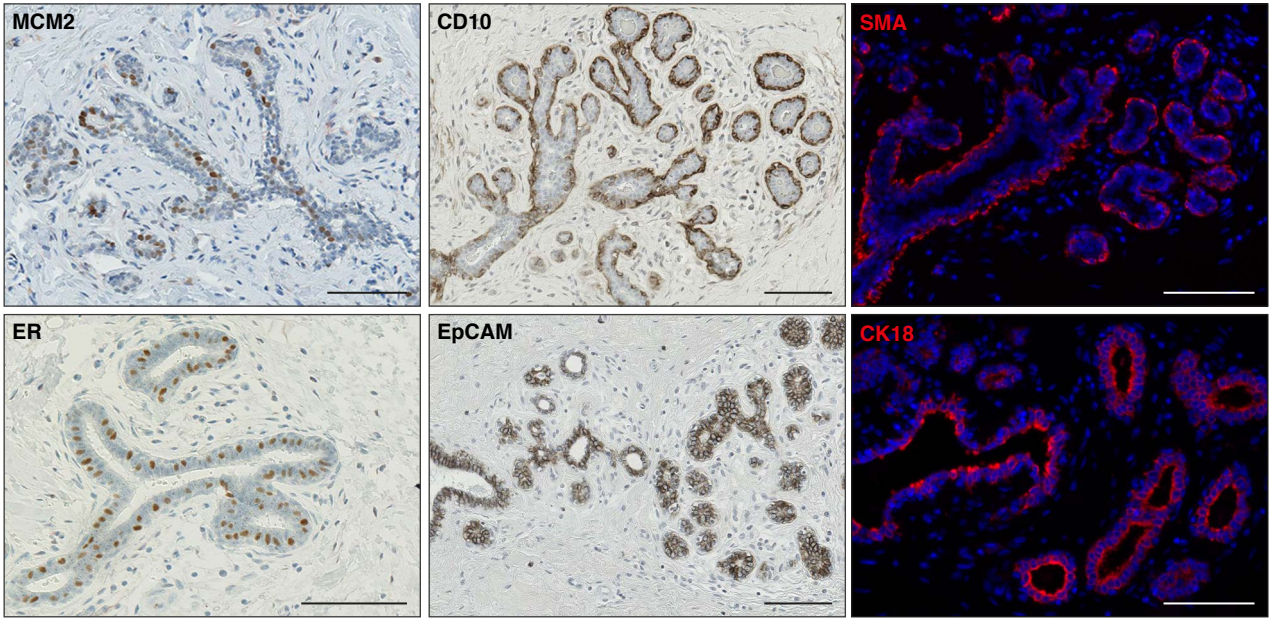

**FIGURE S2**

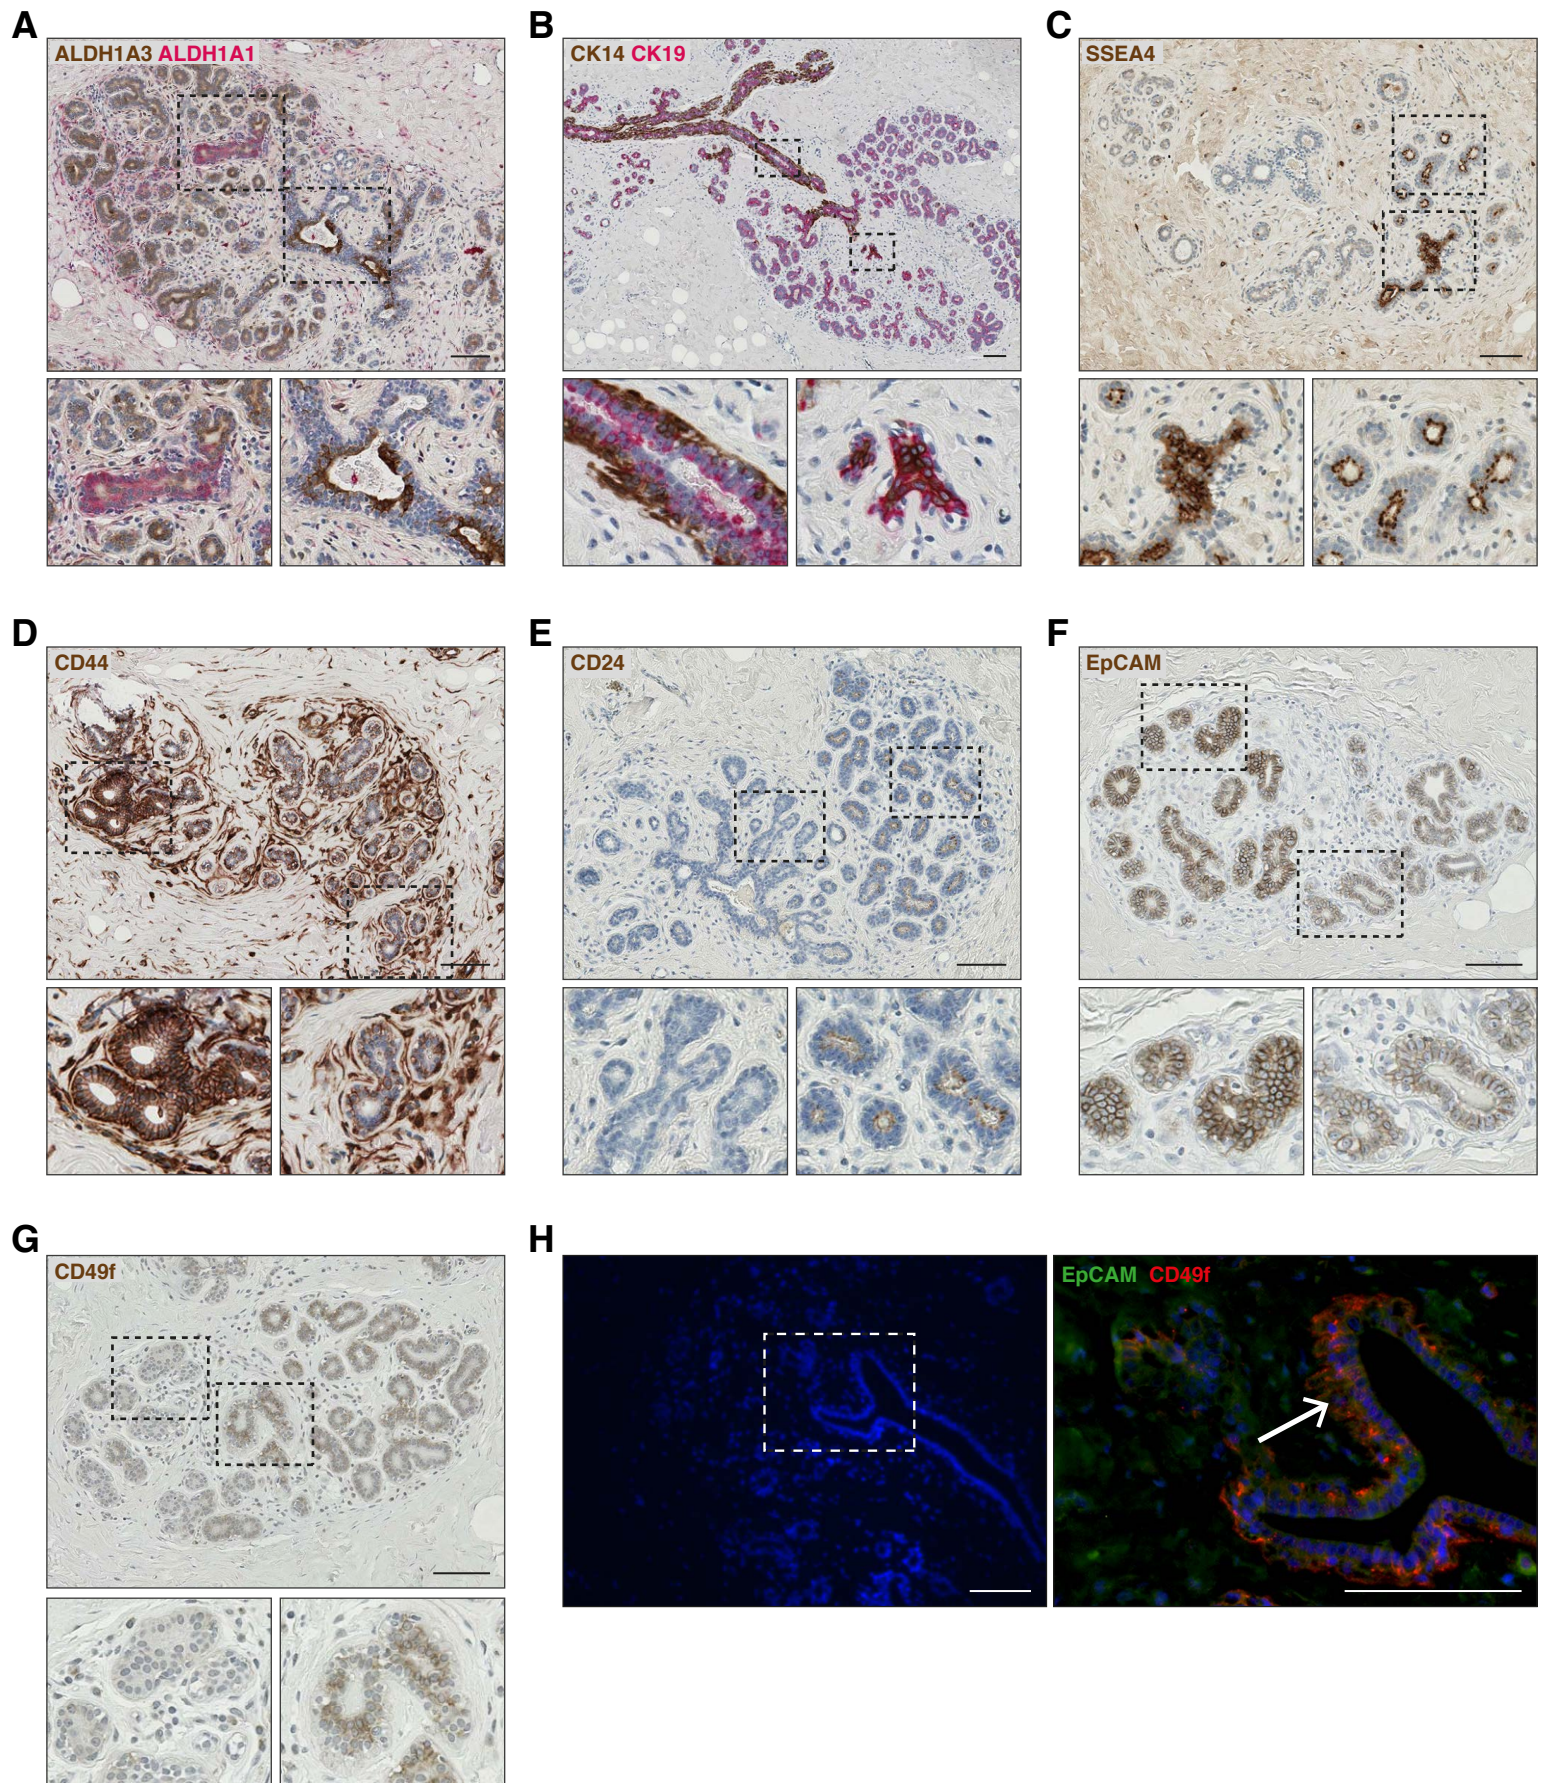

**FIGURE S3**

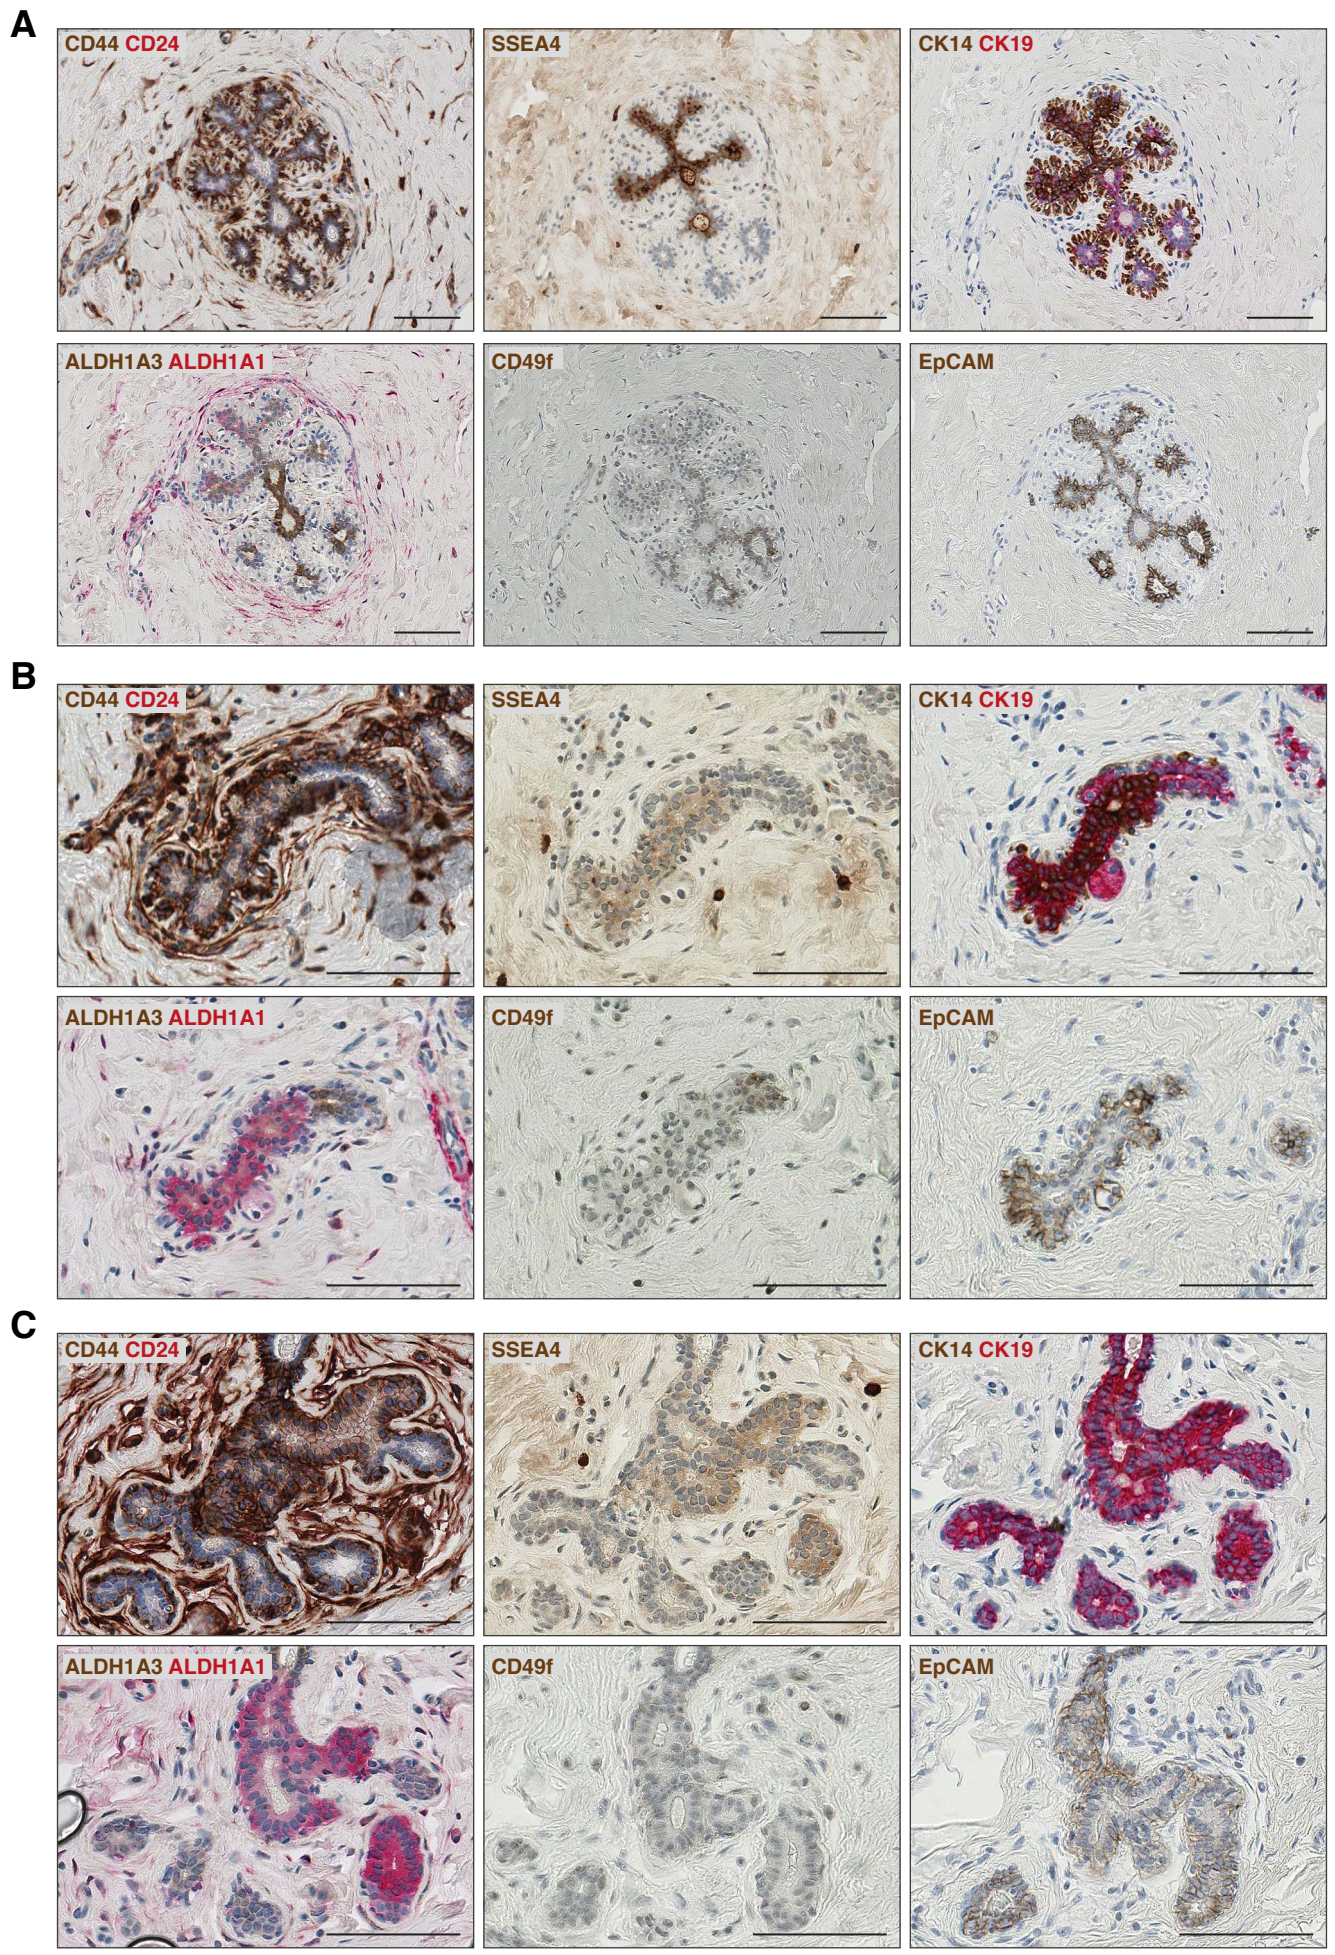

**FIGURE S4**

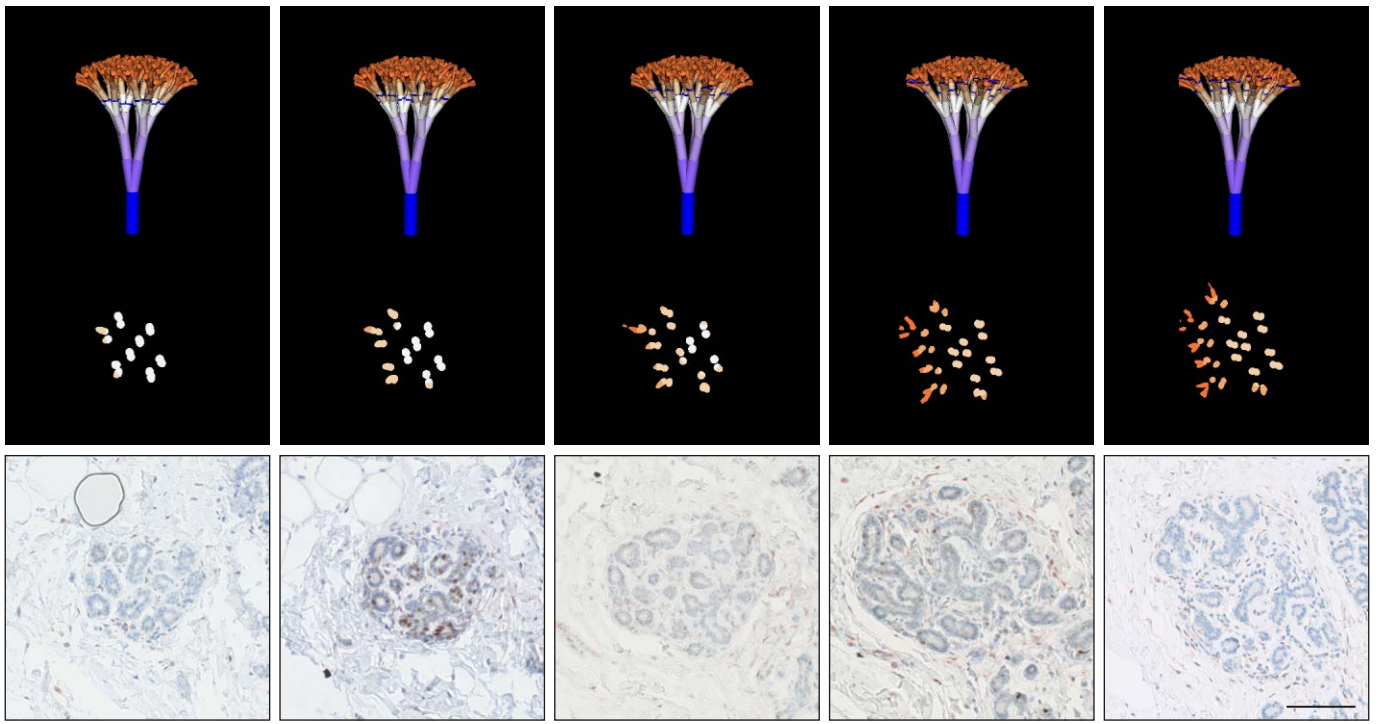

FIGURE S5

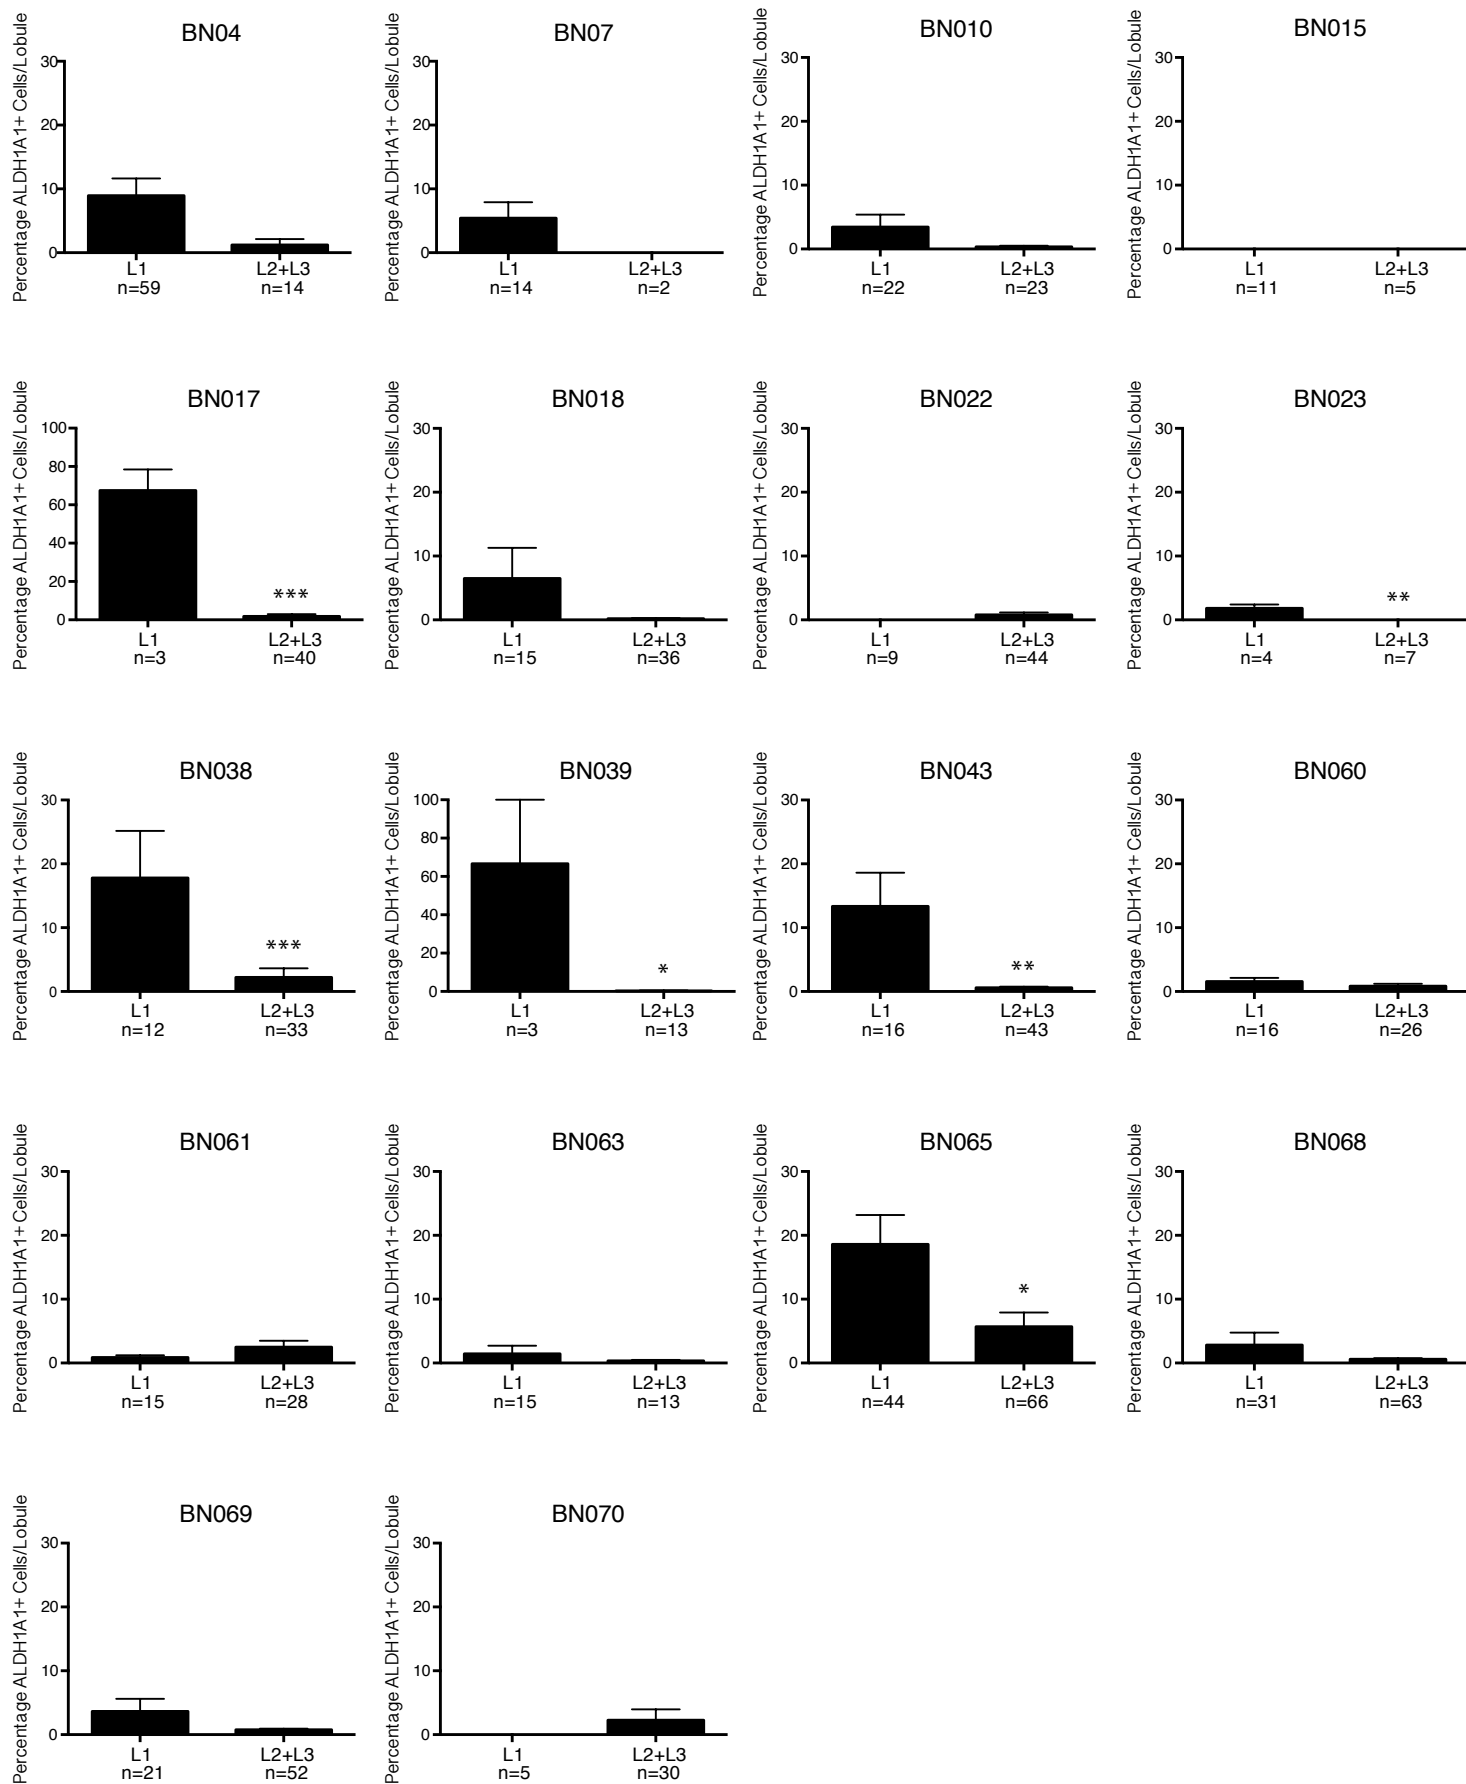

**FIGURE S6**

## SUPPLEMENTAL FIGURE LEGENDS

### **Figure S1. Theoretical one-dimensional models of mammary lobule development based on cell fate decisions (Related to Figure 1)**

**(A)** Schematic drawing of the mammary ductal tree, illustrating the difference in size between lobules type 1, 2 and 3.

**(B)** In situ sections through normal human breast, stained with hematoxylin and eosin, showing cross-sections through the three types of lobules. Scale bar = 100  $\mu\text{m}$ .

**(C)** Summary of cell fate choices taken into consideration when generating the theoretical models shown in D-F.

**(D)** Theoretical one-dimensional models for mammary lobule development. For each model, four generations of cell divisions are shown (indicated in lines of cells from top to bottom). Colors of cells indicate differentiation status, with darker color being more undifferentiated cells (dark red/brown = stem cells, dark pink = first generation of daughter cells, light pink = second generation of daughter cells, grey = third generation of daughter cells, white = fourth generation of daughter cells and beyond). Numbers on cells indicate if they are identical daughters. Symmetric division (example shown in F) would generate cells with the same number, while asymmetric division generates cells with different numbers. Cells with the same number belong to the same generation and fate. Q indicates the quiescent stem cells. Combination of stem cell fate choices summarized in C, generate the eight different models shown in D. These models predict rate of growth and differentiation as well as representation and localization of stem cells in the growing lobule. Two examples of these models are also shown in more detail in main Figure 1.

**(E)** Example of a variant of the model combining asymmetric self-renewal, high rate of division and distal orientation (A1B2C1) where one symmetric self-renewal of stem cells followed by asymmetric self-renewal are additionally included in the model.

**(F)** Example of a variant of the model A1B2C1 where symmetric division of progenitor cells was modeled. The variants of A1B2C1 shown in E and F do not change the predictions of this model in a way that could be verified by IHC analysis. These cell fate choices were not considered further.

### **Figure S2. Expression patterns of proliferation and differentiation markers in normal breast epithelium (Related to Figure 1)**

In situ staining patterns of proliferation marker MCM2, estrogen receptor (ER), myoepithelial markers CD10 and SMA, and luminal markers EpCAM and CK18 in sections through normal human breast. Scale bar = 100  $\mu\text{m}$ .

### **Figure S3. Expression patterns of putative stem cell markers in normal breast epithelium (Related to Figure 2)**

**(A)** Double staining for ALDH1A1 (red) and ALDH1A3 (brown) in the normal breast. ALDH1A1 was detected in distinct islands in the lobule (left insert) while high level ALDH1A3 was detected in the luminal layer of interlobular as well as larger extralobular



ducts (right insert). Lower level ALDH1A3 was detected in the luminal layer of lobules (these cells are not detected by ALDEFLUOR). Cells completely negative for ALDH1A3 were often found next to the strongly positive cells in intralobular ducts. ALDH1A1 and ALDH1A3 markers never co-localized. The staining patterns for ALDH1A1 and ALDH1A3 were very consistent between samples.

**(B)** Double staining for CK14 (brown) and CK19 (red) in the normal breast. CK19 was detected in the vast majority of luminal cells in both ducts and lobules. CK14 was expressed in the basal cell layer of large and intermediate ducts (left insert), but generally not within the lobules. In rare but very distinct clusters within the lobules, CK14 was expressed in the luminal layer and overlapping with CK19 (right insert).

**(C)** Staining for SSEA4 (brown) in the normal breast. SSEA4 was detected in the cytoplasm of distinct islands of the luminal layer in lobules (left insert). In this particular sample we also detected high-level apical SSEA4 staining in some lobules (right insert).

**(D)** Staining for CD44 (brown) in the normal breast. CD44 was detected in the membrane of cells mainly in the basal layer (right insert, low level staining) and occasionally also in the luminal layer (left insert, high level staining).

**(E)** Staining for CD24 (brown) in the normal breast. CD24 was occasionally detected in the luminal layer, predominantly in apical localization (right insert). CD24 positive cells were not detected in all mammaplasty samples. Left insert shows an area negative for CD24.

**(F)** Staining for EpCAM (brown) in normal breast sections. EpCAM was detected in the membrane of the majority of cells in the luminal layer throughout ducts and lobules, at different levels of intensity (left insert show high level and right insert show low level). Rare negative areas could also be seen.

**(G)** Staining for CD49f (brown) in normal breast sections. CD49f was detected at different levels throughout the epithelium. Inserts show areas negative (left) and positive (right), respectively.

**(H)** Double IF staining for EpCAM (green) and CD49f (red). Blue is nuclear DAPI staining. Right image is higher magnification of the area marked in the left image. CD49f+EpCAM- cells is seen in basal localisation in large ducts (arrow).

Each marker was evaluated on at least six different mammaplasty samples and the staining patterns shown are representative. Scale bar = 100  $\mu$ m.

**Figure S4. Putative stem cell markers co-localize in the normal breast epithelium (Related to Figure 2)**

**(A)** Representative area of normal breast epithelium corresponding to an immature lobule emerging from parental secondary duct. SSEA4+, CK14+CK19+ and ALDH1A1+ markers co-localize in this area. CD49f is not expressed in this area and EpCAM is expressed at moderate level.

**(B)** Representative area showing a branching point where CD44+, SSEA4+, CK14+CK19+ and ALDH1A1+ markers co-localize. CD49f is not expressed in this area and EpCAM is expressed at moderate level.

**(C)** Representative area of a type 1 lobule where CD44+, SSEA4+, CK19+ and ALDH1A1+ markers co-localize. CD49f is not expressed in this area and EpCAM is expressed at moderate level. Higher levels of SSEA4 are seen in A due to intense apical staining, not seen in B and C (see also Figure S3C). Scale bar = 100  $\mu$ m.

**Figure S5. Comparison of virtual and real consecutive sections through a mammary lobule (Related to Figure 4)**

Multiple cross-sections through a fractal tree with corresponding consecutive sections through a mammary lobule.

**Figure S6. Representation of ALDH1A1 in mammary lobules in individual samples (Related to Figure 5)**

Quantitative analysis of ALDH1A1+ cells representation in lobules type 1-3 for the 18 different mammoplasty samples included in the study shows that the majority of samples (14 out of 18) show the same trend of higher percentage of ALDH1A1+ cells in lobules type 1 compared with lobules type 2 and 3. This difference was statistically significant for six of the samples. The remaining four samples show no difference or a very slightly higher percentage (not statistically significant) in lobules type 2-3. Bars represent mean percentage ALDH1A1+ cells  $\pm$  SEM. P values were calculated using Mann-Whitney U test. \* $p \leq 0.05$ ; \*\* $p \leq 0.01$ , \*\*\* $\leq 0.001$ .

**SUPPLEMENTAL EXPERIMENTAL PROCEDURES**

**Clinical Characteristics of Patients Included in the Study**

| Patient                | Age | Menopause status                        | Parity#     | Type of Surgery                    | BC History*                  |
|------------------------|-----|-----------------------------------------|-------------|------------------------------------|------------------------------|
| BN004 <sup>1,2,3</sup> | 21  | Premenopausal                           | Nulliparous | Bilateral Breast Reduction         | None                         |
| BN007 <sup>3</sup>     | 34  | Therapy Induced Menopause               | Parous      | Left Mastectomy                    | Contralateral IDC (Age 33)   |
| BN010 <sup>2,3</sup>   | 28  | Premenopausal                           | Nulliparous | Bilateral Breast Reduction         | None                         |
| BN015 <sup>3</sup>     | 44  | Oophorectomy (Age 44)                   | Parous      | Left Risk Reducing Mastectomy      | Contralateral IDC (Age 39)   |
| BN017 <sup>1,2,3</sup> | 24  | Premenopausal                           | Nulliparous | Bilateral Risk Reducing Mastectomy | None (BRCA2 Carrier)         |
| BN018 <sup>3</sup>     | 38  | Premenopausal                           | Nulliparous | Left Mastopexy                     | Contralateral IDC (Age 33)   |
| BN022 <sup>3</sup>     | 40  | Chemotherapy Induced Menopause (Age 40) | Parous      | Right Risk Reducing Mastectomy     | Concurrent Contralateral IBC |
| BN023 <sup>3</sup>     | 46  | Postmenopausal                          | Parous      | Right Risk Reducing Mastectomy     | Contralateral BC (Age 44)    |
| BN024 <sup>1</sup>     | 16  | Premenopausal                           | Nulliparous | Bilateral Breast Reduction         | None                         |
| BN027 <sup>2</sup>     | 43  | Premenopausal                           | Nulliparous | Bilateral Breast Reduction         | None                         |

|                        |    |                                         |             |                                    |                                                      |
|------------------------|----|-----------------------------------------|-------------|------------------------------------|------------------------------------------------------|
| BN037 <sup>4</sup>     | 41 | Chemotherapy Induced Menopause (Age 41) | Parous      | Left Mastectomy                    | Concurrent Contralateral BC (BRCA1 Carrier)          |
| BN038 <sup>1,3</sup>   | 43 | Hysterectomy (Age 40)                   | Parous      | Left Risk Reducing Mastectomy      | Concurrent Contralateral Invasive BC (BRCA2 Carrier) |
| BN039 <sup>1,3</sup>   | 43 | Chemotherapy Induced Menopause (Age 43) | Parous      | Risk Reducing Mastectomy           | Concurrent Contralateral BC (BRCA2 Carrier)          |
| BN041 <sup>4</sup>     | 41 | Premenopausal                           | Parous      | Left Breast Reduction              | Concurrent Contralateral BC                          |
| BN043 <sup>2,3,4</sup> | 42 | Premenopausal                           | Parous      | Bilateral Risk Reducing Mastectomy | None (BRCA1 Carrier)                                 |
| BN044 <sup>4</sup>     | 40 | Premenopausal                           | Nulliparous | Bilateral Mastopexy                | None                                                 |
| BN049 <sup>4</sup>     | 54 | Chemotherapy Induced Menopause (Age 47) | Parous      | Risk Reducing Mastectomy           | Contralateral BC (Age 45)                            |
| BN050 <sup>4</sup>     | 33 | Premenopausal                           | Parous      | Right Risk Reducing Mastectomy     | Concurrent Contralateral DCIS                        |
| BN055 <sup>2,4</sup>   | 40 | Premenopausal                           | Parous      | Bilateral Risk Reducing Mastectomy | None (BRCA2 Carrier)                                 |
| BN059 <sup>4</sup>     | 50 | Postmenopausal                          | Parous      | Risk Reducing Mastectomy           | None (BRCA2 Carrier)                                 |
| BN060 <sup>2,3,4</sup> | 18 | Premenopausal                           | Nulliparous | Bilateral Breast Reduction         | None                                                 |
| BN061 <sup>2,3,4</sup> | 45 | Premenopausal                           | Parous      | Bilateral Breast Reduction         | None                                                 |
| BN062 <sup>4</sup>     | 45 | Premenopausal                           | Nulliparous | Bilateral Breast Reduction         | None                                                 |
| BN063 <sup>3,4</sup>   | 29 | Premenopausal                           | Parous      | Bilateral Risk Reducing Mastectomy | None (BRCA2 Carrier)                                 |
| BN064 <sup>4</sup>     | 46 | Premenopausal                           | Nulliparous | Right Risk Reducing Mastectomy     | Concurrent Contralateral Lobular Carcinoma           |
| BN065 <sup>1,3,4</sup> | 44 | Premenopausal                           | Parous      | Bilateral Risk Reducing Mastectomy | None (BRCA2 Carrier)                                 |
| BN067 <sup>4</sup>     | 46 | Premenopausal                           | Parous      | Bilateral Breast Reduction         | None                                                 |
| BN068 <sup>3,4</sup>   | 42 | Oophorectomy (Age 42)                   | Parous      | Bilateral Risk Reducing Mastectomy | None (BRCA1 Carrier)                                 |
| BN069 <sup>3,4</sup>   | 36 | Premenopausal                           | Parous      | Left Risk Reducing Mastectomy      | Concurrent Contralateral DCIS                        |
| BN070 <sup>3,4</sup>   | 36 | Premenopausal                           | Parous      | Left Risk Reducing Mastectomy      | Concurrent Contralateral Invasive BC (BRCA2 Carrier) |

|                    |    |                                         |             |                                    |                             |
|--------------------|----|-----------------------------------------|-------------|------------------------------------|-----------------------------|
| BN071 <sup>4</sup> | 60 | Postmenopausal                          | Nulliparous | Bilateral Breast Reduction         | None                        |
| BN072 <sup>4</sup> | 53 | Postmenopausal                          | Parous      | Bilateral Risk Reducing Mastectomy | None (BRCA1 Carrier)        |
| BN073 <sup>4</sup> | 37 | Chemotherapy Induced Menopause (Age 37) | Parous      | Right Risk Reducing Mastectomy     | Concurrent Contralateral BC |
| BN074 <sup>4</sup> | 49 | Hysterectomy (Age 47)                   | Parous      | Bilateral Risk Reducing Mastectomy | None (BRCA2 Carrier)        |
| BN075 <sup>4</sup> | 28 | Premenopausal                           | Parous      | Right Breast Reduction             | None                        |

<sup>1</sup> Used for immunostainings of series of markers on consecutive stainings

<sup>2</sup> Stained with immunofluorescence

<sup>3</sup> Included in lobule analysis

<sup>4</sup> Included in mammosphere analysis

# Women were considered parous if at least one pregnancy progressed past the first trimester. Otherwise they were considered nulliparous.

\* BC=Breast Cancer; DCIS=Ductal Carcinoma In Situ; IBC=Inflammatory Breast Cancer; IDC=Invasive Ductal Carcinoma

## Antibodies Used for Immunostainings

| Antigen        | Conjugate | Clone     | Company        | Source | Dilution | Antigen Retrieval |
|----------------|-----------|-----------|----------------|--------|----------|-------------------|
| <b>ALDH1A1</b> |           | 44/ALDH   | BD Biosciences | mouse  | 1:50     | Heat Induced, pH6 |
| <b>ALDH1A1</b> |           | EP1933Y   | Abcam          | rabbit | 1:200    | Heat Induced, pH6 |
| <b>ALDH1A3</b> |           | C-13      | Santa Cruz     | goat   | 1:200    | Heat Induced, pH6 |
| <b>CD10</b>    |           | 56C6      | Novocastra     | mouse  | 1:100    | Heat Induced, pH6 |
| <b>CD24</b>    |           | SN3b      | NeoMarkers     | mouse  | 1:50     | Heat Induced, pH6 |
| <b>CD44</b>    |           | 156-3C11  | NeoMarkers     | mouse  | 1:200    | Heat Induced, pH6 |
| <b>CD49f</b>   |           |           | Atlas          | rabbit | 1:100    | Heat Induced, pH9 |
| <b>CK14</b>    |           | LL002     | Dako           | mouse  | 1:50     | Heat Induced, pH6 |
| <b>CK14</b>    | FITC      | LL002     | Abcam          | mouse  | 1:20     | Heat Induced, pH6 |
| <b>CK18</b>    |           | DC-10     | Novocastra     | mouse  | 1:20     | Heat Induced, pH6 |
| <b>CK19</b>    |           | A53-B/A2  | Abcam          | mouse  | 1:200    | Heat Induced, pH6 |
| <b>EpCAM</b>   |           | VU-1D9    | Novocastra     | mouse  | 1:25     | Trypsin           |
| <b>EpCAM</b>   | FITC      | VU-1D9    | StemCellTech   | mouse  | 1:5      | Heat Induced, pH9 |
| <b>ER</b>      |           | EP1       | Dako           | rabbit | 1:100    | Heat Induced, pH6 |
| <b>MCM2</b>    |           | CRCT2.1   | Novocastra     | mouse  | 1:50     | Heat Induced, pH6 |
| <b>p27</b>     |           | SX53G8    | Dako           | mouse  | 1:25     | Heat Induced, pH6 |
| <b>SMA</b>     |           | HHF35     | Novocastra     | mouse  | 1:100    | Heat Induced, pH6 |
| <b>SSEA4</b>   |           | MC-813-70 | Millipore      | mouse  | 1:50     | Heat Induced, pH6 |

## Theoretical Parameters Used in Modeling Cell Divisions during Branching Morphogenesis (One-Dimensional Modeling)

### *Definitions:*

Stem cells: Cells capable to: a) differentiate and generate all types of differentiated cells present in the mammary lobule, and b) self-renew and generate progenies identical to themselves. We acknowledge that these may be the most undifferentiated cells in the lobule rather than the most primitive cells in the entire mammary gland.

Progenitor cells: Any cells that can proliferate.

Differentiated cells (or terminally differentiated cells): Postmitotic cells with no proliferation potential.

Branching points: The areas of dichotomic split within a lobule.

Branching generation: 0 = no split; 1 = one dichotomic split, two branches; 2 = two dichotomic splits, four branches; 3 = four dichotomic splits, eight branches; etc.

### *Assumptions:*

1. Branching morphogenesis in the lobule is dichotomic.
2. Stem cells can be quiescent.
3. Progenitor and differentiated cells proliferate until terminal differentiation (modeling of mature pre-menopausal lobule, outside pregnancy, lactation, involution).
4. Cellular de-differentiation is not a common phenomenon in the normal adult breast tissue.

### *Cell Fates Taken in Consideration:*

1. Type of cell divisions
  - a. *Self-renewal cell division* – A cell division that generates a daughter cell identical to the mother cell. This cell will have the same proliferation potential as the mother cell, but may occupy a different position.  
OR
  - b. *Differentiating cell division* – A cell division that generates daughter cells different from the mother cell, with increasingly lower proliferation potential. After a finite number of differentiating divisions, terminally differentiated cells with no ability to proliferate are generated.
2. Symmetry of cell divisions (both self-renewal and differentiating divisions can be symmetric or asymmetric)
  - a. *Symmetric cell division* – A cell division that generates identical daughter cells  
OR
  - b. *Asymmetric cell division* – A cell division that generates two distinct progenies

3. Location of cells
  - a. *Proximal* – more undifferentiated daughter cell close to parental duct  
OR
  - b. *Distal* – more undifferentiated daughter cell away from parental duct

*Excluded Parameters:*

1. Cell death.
2. Only luminal cells are shown in the diagrams. Myoepithelial cells form an outer layer, relatively uniform in phenotypic markers. They are not shown in order to simplify the diagrams. The addition of myoepithelial cells does not change the types of morphogenesis predicted.
3. Proliferation and differentiation driven by extrinsic factors (steroid hormones, growth factors, etc.). The growth of the lobule may be halted and re-started depending on levels of these hormones during the menstrual cycle.
4. Feedback and feed-forward signaling between cells with impact on differentiation or proliferation.
5. Mechanical forces with impact on differentiation or proliferation.
6. Development of the lobules during pregnancy, lactation and involution.

### **Experimental Parameters for Fractal Model Generation**

These parameters were measured in tissue sections through normal breast, by measuring ductules in type 3 lobules (classified as described in Experimental Procedures). A total of 12 lobules cut longitudinally from three different mammoplasty samples were analyzed for ductule length. An average of 5 ductules/lobule were measured. For ratio, consecutive ductules (where two branching points were clearly visible) were measured. A total of 9 lobules cut transversally, from three mammoplasty samples were analyzed for duct diameter. Angle measurements were done in longitudinally cut lobules.

1. Length of first ductule in the mature type 3 lobule: 300  $\mu\text{m}$  or 58 cells in circumference
2. Diameter of first ductule in the mature type 3 lobule: 100  $\mu\text{m}$  or 32 cells in circumference
3. Ratio length: 0.794
4. Ratio diameter: 0.858
5. Rotation angle: 60

*Variable parameters:*

- Number of branching generations (number of times the ductules branched)
- Angle of branching

## Fractal Modeling of Lobule Formation

We simulated the growth of breast ducts using a fractal approach, drawing heavily upon work done using L-systems to model the growth of tree-like structures.

In our idealized model, we assumed that every breast duct originates from a single trunk, which branches in two and creates two self-similar structures of reduced size.

The model is made of a set of *ducts* ( $D$ ), each duct starts from a *branching node* (*node* for short) and ends into another one. A duct is *parent* of the ducts (*children*) spawning from its ending node. Similarly we can indicate such an ending node as parent of the ending nodes of the two children ducts.

The model is governed by multiple parameters and initial conditions:

- **L**: the length of the stem (initial duct)
- **R**: the radius of the stem
- **n**: the number of levels of the model
- **q**: the ratio between parent and children thickness (radius)
- **$\lambda$** : the ratio between parent and children length
- **$\beta_i$** : the angle of branching between two children ducts at level  $i$  ( $i=0,1,\dots,n$ );  $\beta_0$  sets the direction of the stem:  $\pi/2$  (the plane described by the two branching ducts is their branching plane)
- **$\alpha$** : the polar angle determining the rotation of the children branching plane with respect to the parent branching plane

All angles can be changed for all levels of branching, which provides a higher flexibility in modelling.

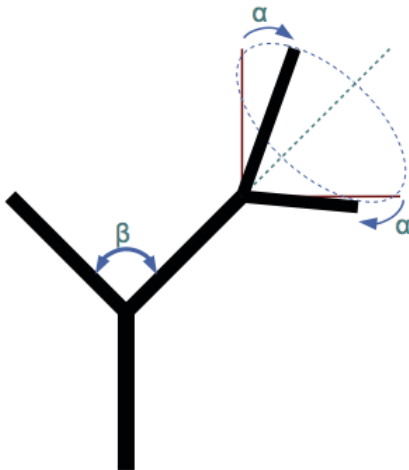

*Figure: The role of  $\alpha$  and  $\beta$  in the creation of the tree. The angle of dichotomic branching is designated  $\beta$ . The rotation of children branches around the parent axis (in red the branches before rotation) is measured by rotation angle  $\alpha$ .*

Parameters and initial conditions were obtained as described above.

The simulations are implemented in Python using simple mathematical formulas (code available upon request). The rendering of the trees is done using the VTK package for Python (courtesy of Enthought, INC) using custom written software.

For each set of parameters, we can generate a duct structure, then slice the duct structure at an arbitrary depth and angle.

We note that the system is fully deterministic, and produces a perfectly symmetric idealized duct structure. Still, even with these simplifications, the structures produced by our model closely resemble structures seen in situ in cross-sections through the breast.

### **Model Fitting**

Fractals were generated by giving values between 3 and 12 for number of branching generations and constant or variable angles of branching between 15-120°. The angles are affected by the angle of the section plane with the three axes of the lobule and may not correspond to the real branching angle.

At the 12th branching generation, the ductule is formed of only 4 cells, and cannot grow following the same ratio as the rest of the fractal tree. Duct ends of 4 and 3 cells can be found in breast tissue sections.

Sections through fractals were compared to tissue sections through lobules 1, 2 and 3. Transversal sections were preferentially analyzed. Additionally, angled sections were generated by changing stem inclination, stem rotation and tree rotation (the three axes of the lobule).

The following criteria were used to compare sections through the computer generated fractal tree to those seen in breast tissue sections. The comparisons were used to eliminate and refine parameters for computer modeling:

1. Maximum diameter of fractal tree (lobule)
2. Total number of ductule sections at maximum number of branches
3. Angles of branching at which ductules contacted each other were eliminated
4. Shape, size and pattern distribution of ductules in sections through fractal tree
5. Angles at which the ductule disposition was different from that observed in situ were eliminated (i.e. center of lobule with lower or higher density of ductules than observed in tissue sections or longitudinal sections in addition to cross sections, in a pattern not seen in tissue sections)

The parameters that modeled best the lobule in situ were variable angle of branching increasing from 15 to 70°.



## Instructions to Use the Software “Ducts”

The software (Windows and Mac versions) can be downloaded from the following link:  
<https://github.com/FedericoV/FractalMammaryLobule>

To use the software:

1. The file “Ducts” will open the following window:

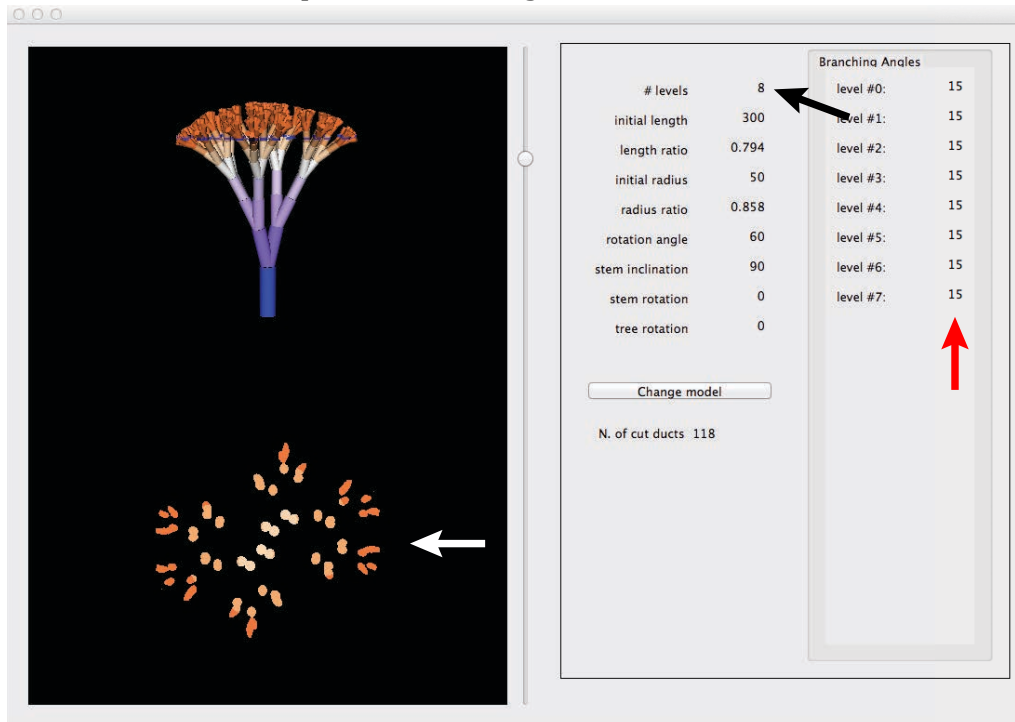

2. Assign the desired parameters (click “Change model” to be able to make changes). For instance in order to model eight dichotomic branching generations (levels) starting from the unique blue duct shown in the window, type 8 in the field # levels (black arrow).
3. Similarly assign the size of the ductule the modeling starts with (300  $\mu\text{m}$  in length and 50  $\mu\text{m}$  in radius in our modeling). The length ratio and radius ratio, between lengths of branches in consecutive generations are 0.794 and respectively 0.858 in our model (see above). The rotation of emerging branches (rotation angle) in the z axis is 60°.
4. The angle of branching can be changed for each branching generation (level) (red arrow).
5. To generate a cross-section click on the cursor at the right side of the image and drag to the desired position. The image of lobule in cross-section will appear at the bottom of the 3D image (white arrow).
6. To zoom in and out left click on the 3D image and use the mouse wheel. Both 3D image and cross-section will zoom. To rotate the 3D image right-click and move the mouse.
7. To change the angle of the cross-section, change the value for stem inclination. In the figure below the stem inclination is changed to 45° (arrowhead), compared to 90° in the picture above.

The interface displays a 3D model of a branching tree structure. The tree has a purple trunk and orange branches. Below the main tree is a smaller, more detailed view of the branching structure. The control panel on the right contains the following parameters:

|                  |       |
|------------------|-------|
| # levels         | 8     |
| initial length   | 300   |
| length ratio     | 0.794 |
| initial radius   | 50    |
| radius ratio     | 0.858 |
| rotation angle   | 60    |
| stem inclination | 45    |
| stem rotation    | 0     |
| tree rotation    | 0     |

Below the parameters is a button labeled "Change model".

N. of cut ducts 79

**Branching Angles**

|           |    |
|-----------|----|
| level #0: | 15 |
| level #1: | 15 |
| level #2: | 15 |
| level #3: | 15 |
| level #4: | 15 |
| level #5: | 15 |
| level #6: | 15 |
| level #7: | 15 |
